# Supplementary material for: Image based Machine Learning for identification of macrophage subsets
Source: PubMed Central journal article supplement (PMC5471192; doi:10.1038/s41598-017-03780-z), 2017-06-14
Supplement: 41598_2017_3780_MOESM1_ESM.pdf [file 41598_2017_3780_MOESM1_ESM.pdf]

**Image based Machine Learning for identification of macrophage subsets**

Hassan M Rostam<sup>1,† ¶</sup>, Paul M Reynolds<sup>2†</sup>, Morgan R Alexander<sup>3</sup>, Nikolaj Gadegaard<sup>2\*</sup>, Amir M Ghaemmaghami<sup>1\*</sup>

<sup>1</sup>Division of Immunology, School of Life Sciences, Faculty of Medicine and Health Sciences, University of Nottingham, Nottingham, NG7 2RD, UK.

<sup>2</sup>Division of Biomedical Engineering, School of Engineering, University of Glasgow, Glasgow, G12 8LT. UK.

<sup>3</sup> Advanced Materials and Healthcare Technologies Division, School of Pharmacy, University of Nottingham, Nottingham, NG7 2RD, UK.

\* Corresponding authors

† Contributed equally to the work.

¶ Current address: Department of Biology, University of Garmian, Kalar, Kurdistan

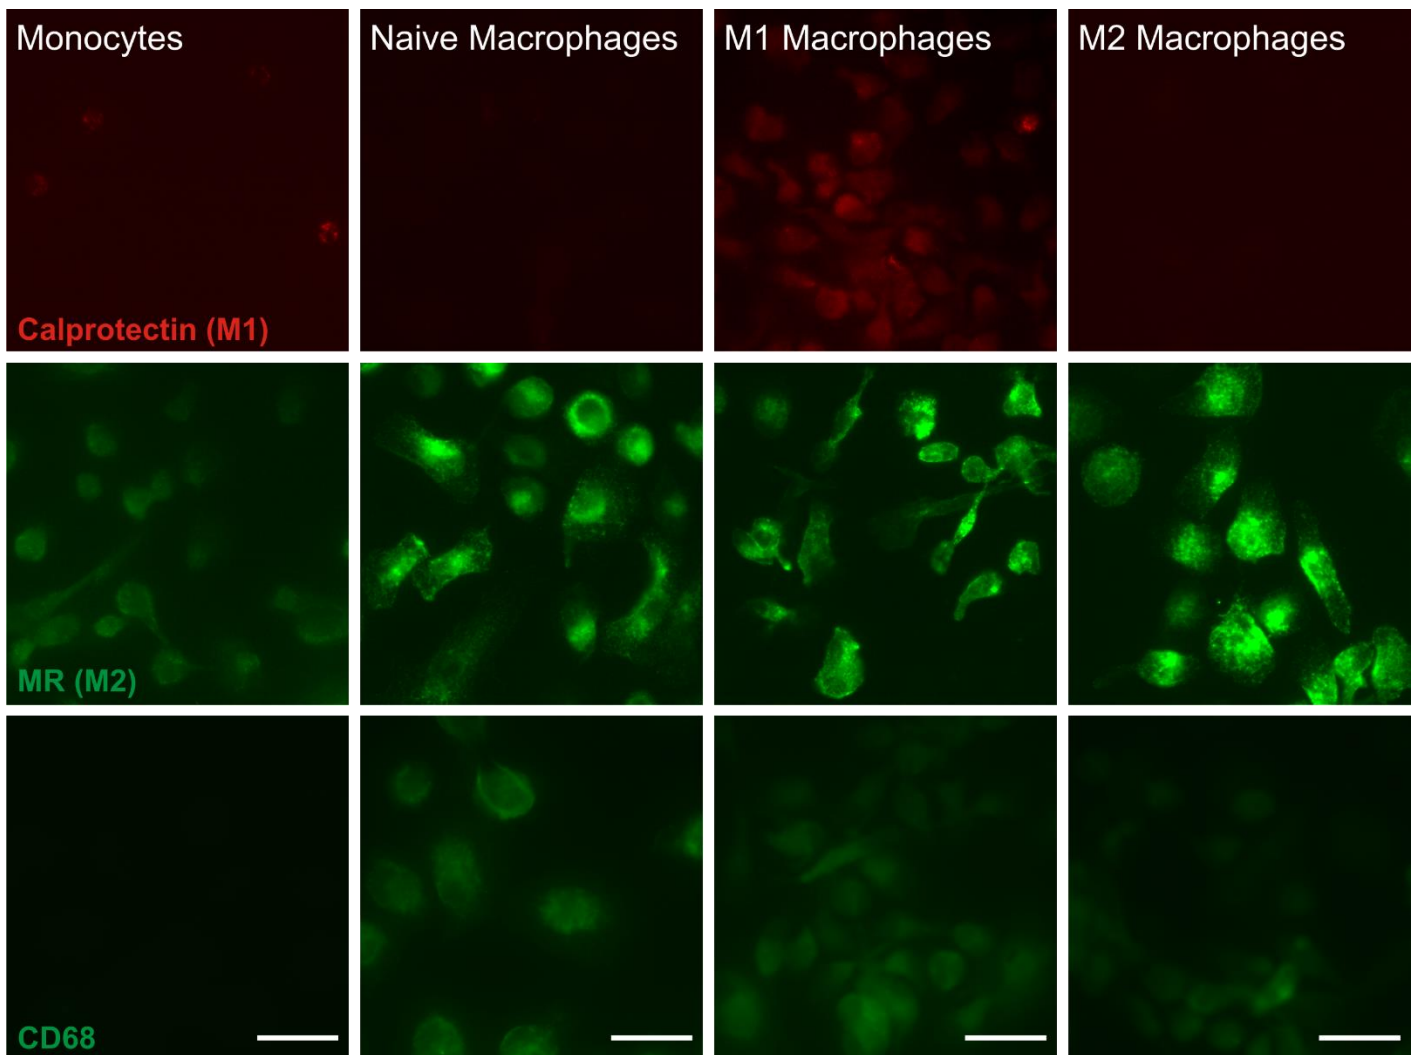

*Supplementary Figure 1 Fluorescent images of cells stained for calprotectin (27E10 antigen, red), mannose receptor (MR, green), and CD68.*

*Scale bar = 25  $\mu$ m. Representative images from n=3 are shown.*

Supplementary information

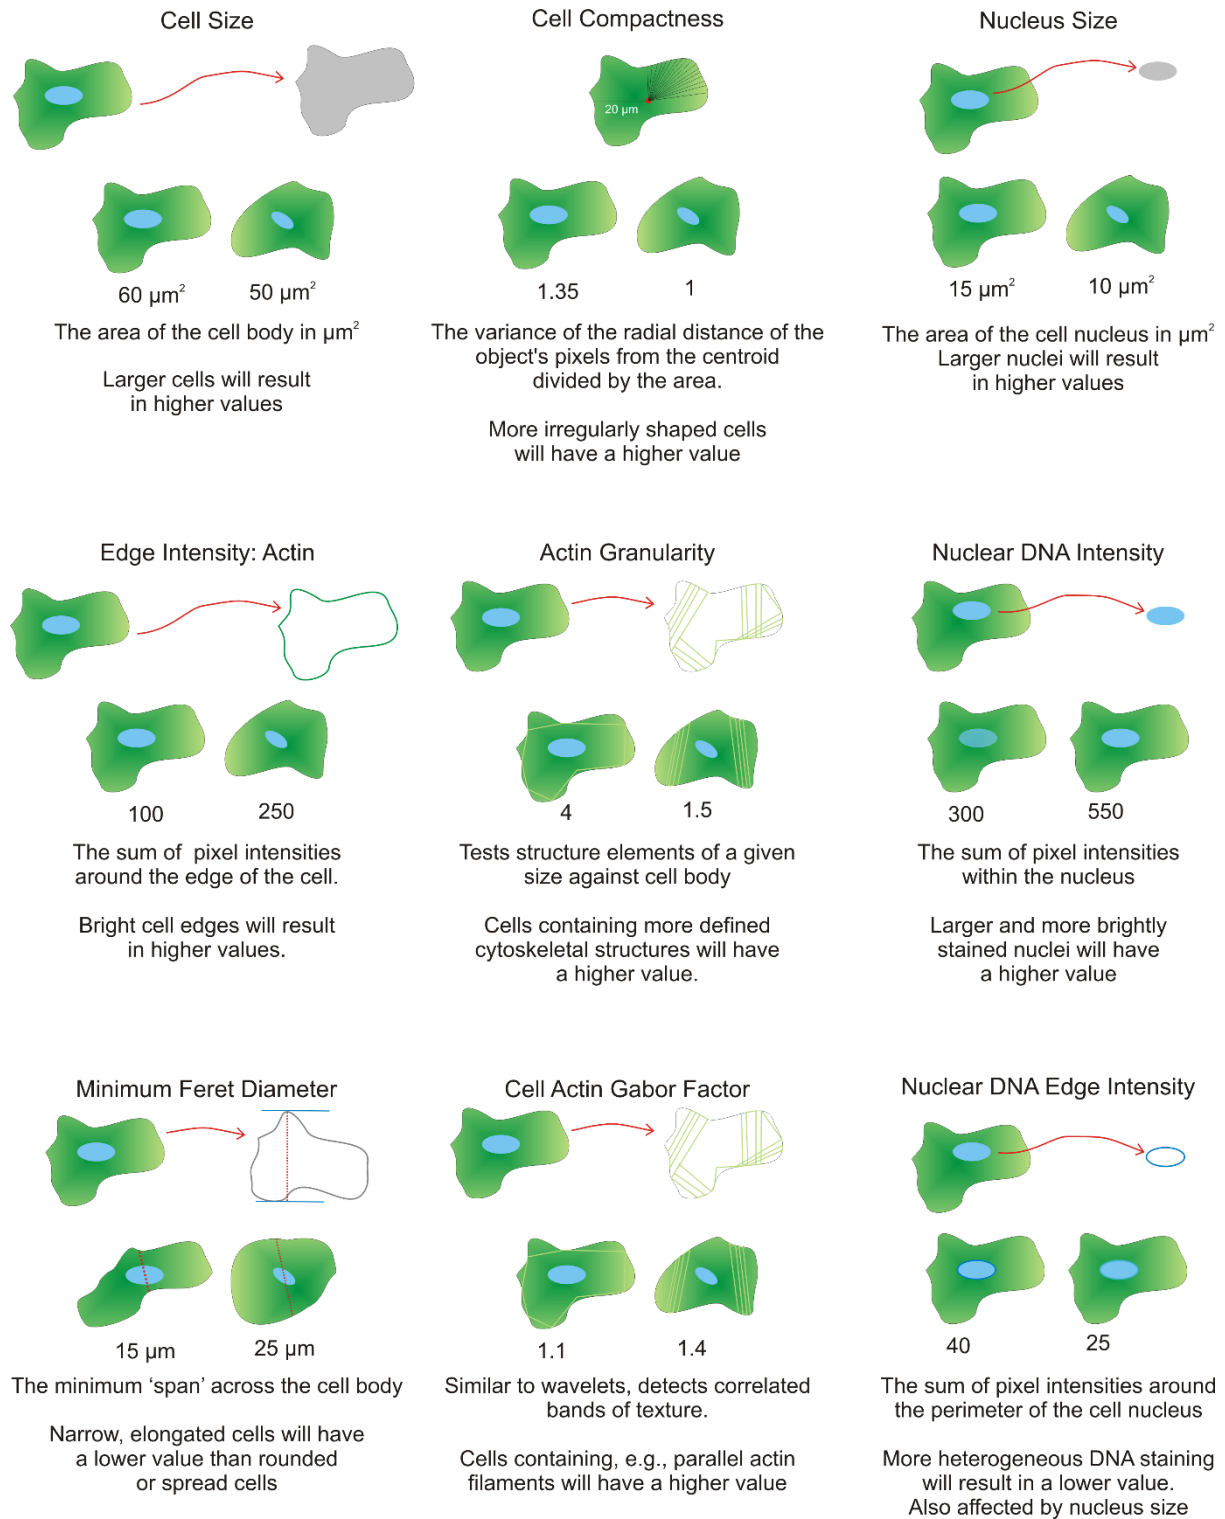

Supplementary Figure 2 Measurements used to form the cytoprofile, as plotted in figure 5 of the main text.

Supplementary information

| Logistic Regression |               |               |                  |             |             |      | AUC       | 0.963 |
|---------------------|---------------|---------------|------------------|-------------|-------------|------|-----------|-------|
|                     | M1 Macrophage | M2 Macrophage | Naïve Macrophage | Monocyte D0 | Monocyte D6 | Σ    | CA        | 0.944 |
| M1 Macrophage       | 98.10%        | 1.40%         | 0.00%            | 0.40%       | 0.00%       | 1560 | F1        | 0.944 |
| M2 Macrophage       | 2.40%         | 94.90%        | 0.00%            | 1.50%       | 1.30%       | 1010 | Precision | 0.944 |
| Naïve Macrophage    | 0.00%         | 0.00%         | 96.60%           | 0.10%       | 3.20%       | 1940 | Recall    | 0.944 |
| Monocyte D0         | 0.00%         | 0.50%         | 0.00%            | 95.30%      | 4.20%       | 660  |           |       |
| Monocyte D6         | 0.00%         | 3.30%         | 11.20%           | 2.70%       | 82.80%      | 950  |           |       |
| Σ                   | 1555          | 1014          | 1981             | 679         | 891         | 6120 |           |       |
| Random Forest       |               |               |                  |             |             |      | AUC       | 0.921 |
|                     | M1 Macrophage | M2 Macrophage | Naïve Macrophage | Monocyte D0 | Monocyte D6 | Σ    | CA        | 0.885 |
| M1 Macrophage       | 92.60%        | 1.70%         | 1.60%            | 2.10%       | 2.10%       | 1560 | F1        | 0.882 |
| M2 Macrophage       | 7.00%         | 85.30%        | 5.80%            | 0.80%       | 1.00%       | 1010 | Precision | 0.886 |
| Naïve Macrophage    | 0.90%         | 0.40%         | 96.80%           | 0.20%       | 1.80%       | 1940 | Recall    | 0.885 |
| Monocyte D0         | 7.60%         | 0.50%         | 2.10%            | 89.20%      | 0.60%       | 660  |           |       |
| Monocyte D6         | 8.50%         | 5.10%         | 16.30%           | 2.20%       | 67.90%      | 950  |           |       |
| Σ                   | 1663          | 947           | 2130             | 654         | 726         | 6120 |           |       |
| Naïve Bayes         |               |               |                  |             |             |      | AUC       | 0.843 |
|                     | M1 Macrophage | M2 Macrophage | Naïve Macrophage | Monocyte D0 | Monocyte D6 | Σ    | CA        | 0.743 |
| M1 Macrophage       | 78.40%        | 4.00%         | 3.10%            | 7.00%       | 7.50%       | 1560 | F1        | 0.744 |
| M2 Macrophage       | 10.50%        | 78.50%        | 4.50%            | 4.90%       | 1.70%       | 1010 | Precision | 0.761 |
| Naïve Macrophage    | 3.90%         | 7.30%         | 64.60%           | 4.30%       | 19.90%      | 1940 | Recall    | 0.743 |
| Monocyte D0         | 5.00%         | 0.30%         | 0.80%            | 93.30%      | 0.60%       | 660  |           |       |
| Monocyte D6         | 6.50%         | 6.60%         | 13.10%           | 4.40%       | 69.40%      | 950  |           |       |
| Σ                   | 1500          | 1061          | 1477             | 899         | 1183        | 6120 |           |       |
| SVM                 |               |               |                  |             |             |      | AUC       | 0.806 |
|                     | M1 Macrophage | M2 Macrophage | Naïve Macrophage | Monocyte D0 | Monocyte D6 | Σ    | CA        | 0.686 |
| M1 Macrophage       | 64.10%        | 13.50%        | 6.00%            | 6.90%       | 9.50%       | 1560 | F1        | 0.689 |
| M2 Macrophage       | 7.40%         | 75.60%        | 10.40%           | 0.40%       | 6.10%       | 1010 | Precision | 0.709 |
| Naïve Macrophage    | 3.50%         | 13.60%        | 63.50%           | 1.30%       | 18.10%      | 1940 | Recall    | 0.686 |
| Monocyte D0         | 2.60%         | 2.00%         | 1.80%            | 92.10%      | 1.50%       | 660  |           |       |
| Monocyte D6         | 7.80%         | 10.30%        | 16.50%           | 2.60%       | 62.70%      | 950  |           |       |
| Σ                   | 1234          | 1349          | 1600             | 770         | 1167        | 6120 |           |       |
| kNN                 |               |               |                  |             |             |      | AUC       | 0.674 |
|                     | M1 Macrophage | M2 Macrophage | Naïve Macrophage | Monocyte D0 | Monocyte D6 | Σ    | CA        | 0.503 |
| M1 Macrophage       | 64.80%        | 3.80%         | 15.50%           | 9.40%       | 6.50%       | 1560 | F1        | 0.489 |
| M2 Macrophage       | 23.60%        | 44.50%        | 24.30%           | 4.70%       | 3.10%       | 1010 | Precision | 0.493 |
| Naïve Macrophage    | 27.40%        | 10.20%        | 48.50%           | 4.80%       | 9.00%       | 1940 | Recall    | 0.503 |
| Monocyte D0         | 14.70%        | 1.70%         | 7.40%            | 75.50%      | 0.80%       | 660  |           |       |
| Monocyte D6         | 25.10%        | 11.10%        | 41.30%           | 3.80%       | 18.80%      | 950  |           |       |
| Σ                   | 2116          | 822           | 1869             | 821         | 492         | 6120 |           |       |

Supplementary Table 1 Comparison of 5 classifier models used to segment immunofluorescent data. Confusion matrices are presented for each classifier, alongside accuracy metrics AUC (area under curve), CA (classifier accuracy), F1 (F score), Precision and Recall. All metrics are a result of 10 fold cross validation analysis.

| Algorithm           | Parameter settings                                                                                                                                                             |
|---------------------|--------------------------------------------------------------------------------------------------------------------------------------------------------------------------------|
| Logistic regression | <b>Regularization:</b> Ridge (L2), C=1                                                                                                                                         |
| Random forest       | <b>Number of trees:</b> 20<br><b>Maximal number of considered features:</b> 5<br><b>Maximal tree depth:</b> unlimited<br><b>Stop splitting nodes with maximum instances:</b> 5 |
| Naïve Bayes         | -                                                                                                                                                                              |
| SVM                 | <b>SVM type:</b> C-SVM, C=1.0<br><b>Kernel:</b> RBF, $\exp(-1.0 x-y ^2)$<br>Numerical tolerance: 0.001<br><b>Iteration limit:</b> 100                                          |
| kNN                 | <b>Number of neighbours:</b> 10<br><b>Metric:</b> Euclidean<br><b>Weight:</b> Uniform                                                                                          |

*Supplementary Table 2 Details of classifiers used for segmentation of immune cells*
